# Supplementary material for: Transcriptome Analysis of Honeybee (Apis Mellifera) Haploid and Diploid Embryos Reveals Early Zygotic Transcription during Cleavage
Source: PubMed Central journal article supplement (PMC4713447; doi:10.1371/journal.pone.0146447), 2016-01-11
Supplement: pone.0146447.s013.pdf [file pone.0146447.s013.pdf]

## S8: Information of motif search.

1: SCOPE output of consensus sequence of TAGteam putative of *A. mellifera* found in the promoter of zygotic genes class, haploid embryos (A) and diploid embryos (B). The selected motif is in purple.

(A)

|     | Consensus Sequence | Count | Sig Value | Coverage |
|-----|--------------------|-------|-----------|----------|
| #1  | bccad              | 17402 | 545.4416  | 96.10%   |
| #2  | aadatw             | 60960 | 250.0416  | 97.10%   |
| #3  | hagndgha           | 7242  | 217.9103  | 87.00%   |
| #4  | ctnndgcw           | 2589  | 201.103   | 56.30%   |
| #5  | aaata              | 37239 | 182.7164  | 96.90%   |
| #6  | atgga              | 4393  | 148.9229  | 77.80%   |
| #7  | ccaaa              | 3453  | 128.2851  | 72.00%   |
| #8  | aaatt              | 35892 | 127.7127  | 96.50%   |
| #9  | ctgca              | 1867  | 122.3791  | 48.60%   |
| #10 | ctgga              | 1694  | 112.7276  | 46.80%   |
| #11 | atcca              | 3756  | 109.4426  | 72.30%   |
| #12 | agaag              | 5500  | 102.4758  | 78.20%   |
| #13 | <b>aggta</b>       | 2205  | 78.6195   | 56.60%   |
| #14 | ascwddwrcag        | 252   | 76.3445   | 4.20%    |
| #15 | ctgaa              | 3365  | 75.8061   | 72.80%   |
| #16 | agcnnnagc          | 476   | 73.0569   | 10.80%   |
| #17 | cagngca            | 568   | 71.9061   | 15.10%   |
| #18 | gatga              | 4491  | 71.3759   | 77.80%   |
| #19 | ccaag              | 1551  | 68.5935   | 42.20%   |
| #20 | aaacc              | 2433  | 61.3895   | 59.60%   |
| #21 | agennaag           | 644   | 61.344    | 18.20%   |
| #22 | agctc              | 1113  | 61.1016   | 32.60%   |
| #23 | atggg              | 1146  | 60.7781   | 35.80%   |
| #24 | accat              | 2509  | 59.8637   | 61.90%   |
| #25 | cagnnncag          | 470   | 59.5073   | 12.00%   |
| #26 | accag              | 1300  | 58.2172   | 38.60%   |
| #27 | acatc              | 3211  | 55.2039   | 71.60%   |
| #28 | atcag              | 2792  | 54.4725   | 65.90%   |
| #29 | aggat              | 3160  | 54.3256   | 67.40%   |
| #30 | ctgnnntgc          | 486   | 51.6271   | 13.10%   |

(B)

|     | Consensus Sequence | Count | Sig Value | Coverage |
|-----|--------------------|-------|-----------|----------|
| #1  | cagnwncw           | 4516  | 396.2405  | 0.665    |
| #2  | cagnwnha           | 9937  | 353.5446  | 0.907    |
| #3  | scwnhwgcw          | 3087  | 345.3769  | 0.456    |
| #4  | akgbah             | 34222 | 311.3976  | 0.967    |
| #5  | aattnt             | 32331 | 250.097   | 0.955    |
| #6  | ttaa               | 25869 | 246.4297  | 0.946    |
| #7  | ttaat              | 24329 | 225.1557  | 0.95     |
| #8  | ccaaa              | 5964  | 178.2223  | 0.831    |
| #9  | <b>atgaa</b>       | 20215 | 173.3149  | 0.958    |
| #10 | tatca              | 15412 | 167.0161  | 0.94     |
| #11 | accat              | 4486  | 166.5601  | 0.742    |
| #12 | aacaa              | 18100 | 161.065   | 0.948    |
| #13 | ctaaa              | 10338 | 156.1421  | 0.912    |
| #14 | accag              | 2471  | 153.0067  | 0.515    |
| #15 | aggta              | 4017  | 151.874   | 0.704    |
| #16 | ascwdnwcag         | 711   | 139.2318  | 0.143    |
| #17 | agcag              | 2993  | 134.1849  | 0.549    |
| #18 | atgga              | 7340  | 133.5298  | 0.862    |
| #19 | ctgga              | 2872  | 132.0334  | 0.576    |
| #20 | ctgca              | 3142  | 130.6922  | 0.596    |
| #21 | aagct              | 4241  | 129.4887  | 0.665    |
| #22 | caaga              | 6819  | 125.8912  | 0.856    |
| #23 | tacaa              | 15943 | 124.6433  | 0.939    |
| #24 | aagaa              | 25856 | 116.7011  | 0.958    |
| #25 | taaca              | 12174 | 111.2674  | 0.921    |
| #26 | caaca              | 6632  | 104.379   | 0.835    |
| #27 | agcnnnagc          | 810   | 103.8675  | 0.158    |
| #28 | ctata              | 10319 | 101.5278  | 0.894    |
| #29 | agcat              | 4954  | 98.7163   | 0.782    |
| #30 | ctgaa              | 5705  | 98.6594   | 0.821    |

2: PWM (position weight matrix) of selected motif as TAGteam putative of *A. mellifera* (ATGAA).

| PWM: |      |      |      |      |      |
|------|------|------|------|------|------|
| a    | 4017 | 0    | 0    | 0    | 4017 |
| c    | 0    | 0    | 0    | 0    | 0    |
| g    | 0    | 4017 | 4017 | 0    | 0    |
| t    | 0    | 0    | 0    | 4017 | 0    |

**3:** PWM (position weight matrix) used for alignment in STAMP. This PWM was obtained in Biedler, *et al* (2012)

**>EZG\_VBRGGTA\_400 (PWM from *Aedes aegypti* found by Biedler *et al* 2012)**

| A   | C  | G   | T   |
|-----|----|-----|-----|
| 47  | 20 | 37  | 0   |
| 0   | 29 | 16  | 59  |
| 64  | 0  | 40  | 0   |
| 0   | 0  | 104 | 0   |
| 0   | 0  | 104 | 0   |
| 0   | 0  | 0   | 104 |
| 104 | 0  | 0   | 0   |

**>YAGGTA\_PWM\_Renzis\_400 (PWM from *Drosophila* found by De Renzis *et al* 2007)**

| A   | C   | G   | T   |
|-----|-----|-----|-----|
| 0   | 100 | 0   | 43  |
| 143 | 0   | 0   | 0   |
| 0   | 0   | 143 | 0   |
| 0   | 0   | 143 | 0   |
| 0   | 0   | 0   | 143 |
| 143 | 0   | 0   | 0   |

**>YAGGTAG\_PWM\_Bosch\_2500 (PWM from *Drosophila* found by ten Bosch *et al* 2006)**

| A  | C  | G  | T  |
|----|----|----|----|
| 0  | 45 | 0  | 20 |
| 65 | 0  | 0  | 0  |
| 0  | 0  | 65 | 0  |
| 0  | 0  | 65 | 0  |
| 0  | 0  | 0  | 65 |
| 65 | 0  | 0  | 0  |
| 0  | 0  | 65 | 0  |

**Sequences of TAGteam motifs from *Drosophila*, obtained in ten Bosch *et al* (2006)**

>TAGteam1  
TAGGTAG  
>TAGteam2  
CAGGTAG  
>TAGteam3  
CAGGCAG
